# Supplementary material for: Exploring the urinary selenometabolome following a multi-phase selenite administration regimen in humans
Source: Royal Society of Chemistry journal article supplement (doi:10.1039/c6mt00051g), 2016-01-01
Supplement: c6mt00051g1.pdf [file c6mt00051g1.pdf]

1 **Fig. S1.** Chromatographic separation of the selenium metabolites studied under cation exchange  
2 (1<sup>st</sup> column), reversed-phase (2<sup>nd</sup> column), and anion exchange chromatographic conditions (3<sup>rd</sup>  
3 column). The figure shows chromatograms of mixtures of standards in water (containing 5.0  $\mu\text{g}$   
4  $\text{Se L}^{-1}$  of TMSe, selenosugar 1, and selenosugar 3 for the reversed-phase and cation exchange  
5 mixture and 2.0  $\mu\text{g Se L}^{-1}$  of TMSe, selenosugar 1, selenosugar 3, selenite, and selenate for the  
6 anion exchange mixture) (1<sup>st</sup> row), urine collected in the pre-supplementation phase (2<sup>nd</sup> row), and  
7 urine collected in the 400  $\mu\text{g}$  supplementation phase (3<sup>rd</sup> row). Asterisks indicate the peaks used  
8 for quantitation. Selenite was always below the limit of quantitation (0.2  $\mu\text{g Se L}^{-1}$ ). Selenate levels  
9 in the pre-supplementation phase were scattered around the limit of quantitation (0.2  $\mu\text{g Se L}^{-1}$ ), falling  
10 within the range 0.1-0.3  $\mu\text{g Se L}^{-1}$ . The column recovery (defined as the percentage of the sum of all peaks  
11 eluted from the HPLC column relative to the total urinary selenium) was within the range of 27-41% for  
12 the three chromatographic columns and all volunteers under conditions of no supplementation. Column  
13 recovery increased upon supplementation due to the dominance of the selenosugars but plateaued at ca.  
14 80% for the 400  $\mu\text{g}$  supplementation phase. Peaks at low retention times (2-4 min) are seen on the cation  
15 exchange column and include selenate (RT = 2 min), possibly with other selenium species the identity of  
16 which is yet to be established. The contribution of these unknown peaks to the column recovery, however,  
17 was small (<5%).

18
